# Supplementary material
Source: bioRxiv or medRxiv preprint supplement (https://medrxiv.org/highwire/filestream/96850/field_highwire_adjunct_files/0/2020.09.14.20191106-1.pdf)
Supplement: Supplementary file [file 2020.09.14.20191106-1.pdf]

**Supplemental Table 1.** Patterns of COVID-19 infection in families with serological testing.

| <b>Mothers</b> | <b>Partners</b> | <b>Newborns</b> | <b>n</b> |
|----------------|-----------------|-----------------|----------|
| Negative       | Negative        | Negative        | 1009     |
| Negative       | Negative        | NA              | 117      |
| Negative       | NA              | Negative        | 113      |
| Negative       | NA              | NA              | 35       |
| Negative       | Positive        | Negative        | 19       |
| NA             | NA              | Negative        | 18       |
| NA             | NA              | NA              | 15       |
| NA             | Negative        | Negative        | 13       |
| Positive       | Negative        | Positive        | 7        |
| Positive       | Positive        | Positive        | 7        |
| Positive       | Negative        | Negative        | 5        |
| Positive       | Negative        | NA              | 5        |
| Negative       | Positive        | NA              | 4        |
| Negative       | Negative        | Positive        | 3        |
| NA             | Negative        | NA              | 3        |
| Positive       | Positive        | Negative        | 2        |
| Positive       | Positive        | NA              | 2        |
| NA             | Positive        | Negative        | 2        |
| Positive       | NA              | Negative        | 1        |

NA: data not available
